# Supplementary material for: Microglial Exosome miR-7239-3p Promotes Glioma Progression by Regulating Circadian Genes
Source: PubMed Central journal article supplement (PMC8055789; doi:10.1007/s12264-020-00626-z), 2021-02-02
Supplement: 12264_2020_626_MOESM1_ESM.pdf [file 12264_2020_626_MOESM1_ESM.pdf]

## Supplementary Materials

Table S1. Primers for Quantitative Real-Time PCR

| Primer name                     | Sequence                     |
|---------------------------------|------------------------------|
| <i>iNOS</i> -Forward            | 5'-TTTGGGAATGGAGACTGT-3'     |
| <i>iNOS</i> -Reverse            | 5'-AAGGTGTGGTTGAGTTCT-3'     |
| <i>IL-12</i> -Forward           | 5'-CCTTGGTAGCATCTATGA-3'     |
| <i>IL-12</i> -Reverse           | 5'-GGTTGTGATTCTGAAGTG-3'     |
| <i>Arg-1</i> -Forward           | 5'-CCAGATGTACCAGGATTC-3'     |
| <i>Arg-1</i> -Reverse           | 5'-GCTTGTCTACTTCAGTCA-3'     |
| <i>IL-4</i> -Forward            | 5'-ATGCTTGAAGAAGAAGACTCTA-3' |
| <i>IL-4</i> -Reverse            | 5'-GTGGACTTGGACTCATTC-3'     |
| <i>Bmal1</i> -Forward           | 5'-TAGCCAGAATGACCTTATTG-3'   |
| <i>Bmal1</i> -Reverse           | 5'-AGTGTCCGAGGAAGATAG-3'     |
| $\beta$ - <i>actin</i> -Forward | 5'-TATGGAATCCTGTGGCATC-3'    |
| $\beta$ - <i>actin</i> -Reverse | 5'-GTGTTGGCATAGAGGTCTT-3'    |
| <i>U6</i> -Forward              | 5'-GCCGCGT CGTGAAGCGTTC-3'   |
| <i>U6</i> -Reverse              | 5'-GTGCAGG GTCCGAGGT-3'      |

#
